# Supplementary material for: Identification and quantification of serum KIN17 protein based on ELISA assay and exploring its clinical diagnostic value in liver cancer
Source: Royal Society of Chemistry journal article supplement (doi:10.1039/d4ay00793j), 2024-01-01
Supplement: d4ay00793j1.pdf [file d4ay00793j1.pdf]

S1 Precision analysis of three levels of verified through 3 batches.

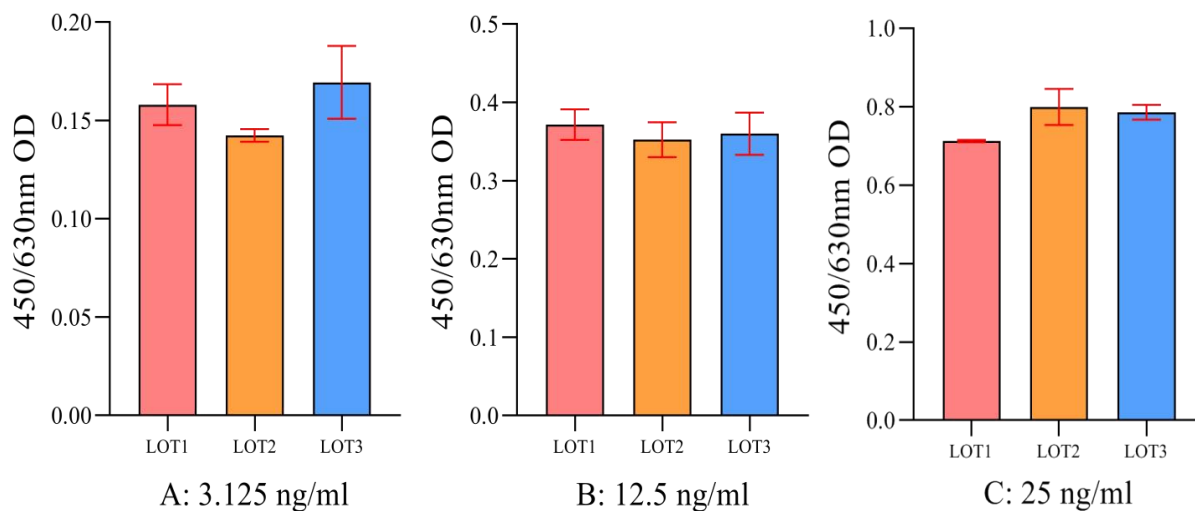

|                              | Number | AVG±AD      | Intra assay CV% | Inter assay CV% |
|------------------------------|--------|-------------|-----------------|-----------------|
| <b>Level 1 (3.125 ng/mL)</b> |        |             |                 |                 |
| LOT 1                        | 3      | 0.158±0.010 | 6.6             |                 |
| LOT 2                        | 3      | 0.142±0.003 | 2.2             | 8.7             |
| LOT 3                        | 3      | 0.169±0.019 | 11.0            |                 |
| <b>Level 2 (12.5 ng/mL)</b>  |        |             |                 |                 |
| LOT 1                        | 3      | 0.372±0.020 | 5.3             |                 |
| LOT 2                        | 3      | 0.352±0.020 | 6.2             | 2.7             |
| LOT 3                        | 3      | 0.360±0.027 | 7.4             |                 |
| <b>Level 2 (25 ng/mL)</b>    |        |             |                 |                 |
| LOT 1                        | 3      | 0.712±0.003 | 0.5             |                 |
| LOT 2                        | 3      | 0.800±0.046 | 5.7             | 6.1             |
| LOT 3                        | 3      | 0.786±0.019 | 2.4             |                 |

D

S1 Precision analysis of three levels of verified through 5 batches.

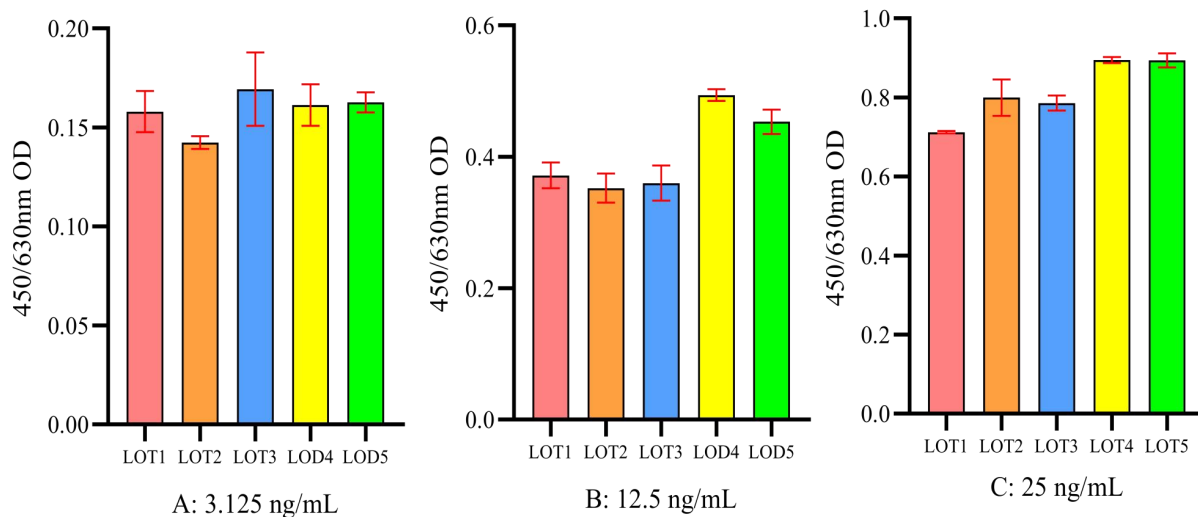

|                              | Number | AVG±SD      | Intra-assay CV% | Inter-assay CV% |
|------------------------------|--------|-------------|-----------------|-----------------|
| <b>Level 1 (3.125 ng/mL)</b> |        |             |                 |                 |
| LOT 1                        | 3      | 0.158±0.010 | 6.6             |                 |
| LOT 2                        | 3      | 0.142±0.003 | 2.2             |                 |
| LOT 3                        | 3      | 0.169±0.019 | 11              | 6.3             |
| LOT 4                        | 3      | 0.161±0.011 | 6.5             |                 |
| LOT 5                        | 3      | 0.163±0.005 | 3.1             |                 |
| <b>Level 2 (12.5 ng/mL)</b>  |        |             |                 |                 |
| LOT 1                        | 3      | 0.372±0.020 | 5.3             |                 |
| LOT 2                        | 3      | 0.352±0.020 | 6.2             |                 |
| LOT 3                        | 3      | 0.360±0.027 | 7.4             | 15.6            |
| LOT 4                        | 3      | 0.494±0.009 | 1.8             |                 |
| LOT 5                        | 3      | 0.453±0.018 | 4.1             |                 |
| <b>Level 3 (25 ng/mL)</b>    |        |             |                 |                 |
| LOT 1                        | 3      | 0.712±0.003 | 0.5             |                 |
| LOT 2                        | 3      | 0.800±0.046 | 5.7             |                 |
| LOT 3                        | 3      | 0.786±0.019 | 2.4             | 9.5             |
| LOT 4                        | 3      | 0.895±0.008 | 0.8             |                 |
| LOT 5                        | 3      | 0.894±0.018 | 2               |                 |

### S3 Specificity analysis of KIN17 protein with AFP, CEA and SCCA in ELISA.

| Standard items   | Number | Average OD | SD    | P value of t-test<br>with KIN17 | Differences |
|------------------|--------|------------|-------|---------------------------------|-------------|
| Blank (0 ng/mL)  | 2      | 0.096      | /     | /                               | /           |
| KIN17 (25 ng/mL) | 3      | 1.815      | 0.009 | /                               | /           |
| AFP (100 ng/mL)  | 3      | 0.080      | 0.002 | P < 0.0001                      | Yes(****)   |
| CEA (100 ng/mL)  | 3      | 0.098      | 0.007 | P < 0.0001                      | Yes(****)   |
| SCCA (70 ng/mL)  | 3      | 0.087      | 0.009 | P < 0.0001                      | Yes(****)   |

### S4 Stability analysis of enzyme-labeled plates stored at 25 °C and 37 °C for different time.

| Temperature/concentration | Number | Average OD | SD    | P value of t-test<br>with day 0 | Differences |
|---------------------------|--------|------------|-------|---------------------------------|-------------|
| <b>37°C/3.125 ng/mL</b>   |        |            |       |                                 |             |
| Day 0                     | 3      | 0.123      | 0.011 | /                               | /           |
| Day 4                     | 3      | 0.121      | 0.005 | P=0.818                         | NS          |
| Day 7                     | 3      | 0.119      | 0.005 | P=0.609                         | NS          |
| Day 14                    | 3      | 0.098      | 0.003 | P=0.018                         | Yes(*)      |
| <b>25°C/3.125 ng/mL</b>   |        |            |       |                                 |             |
| Day 0                     | 3      | 0.295      | 0.007 | /                               | /           |
| Day 7                     | 3      | 0.282      | 0.006 | P=0.069                         | NS          |
| Day 14                    | 3      | 0.174      | 0.004 | P < 0.0001                      | Yes(****)   |

### S5 Age and gender analysis of healthy group and liver cancer group

| Group        | Number | Age<br>(AVG±SD) | Gender<br>(Male/Female) | P value of age | P value of gender |
|--------------|--------|-----------------|-------------------------|----------------|-------------------|
| Health       | 88     | 55±6            | 69/19                   | 0.127 (ns)     | 0.856 (ns)        |
| Liver cancer | 109    | 57±11           | 99/10                   |                |                   |

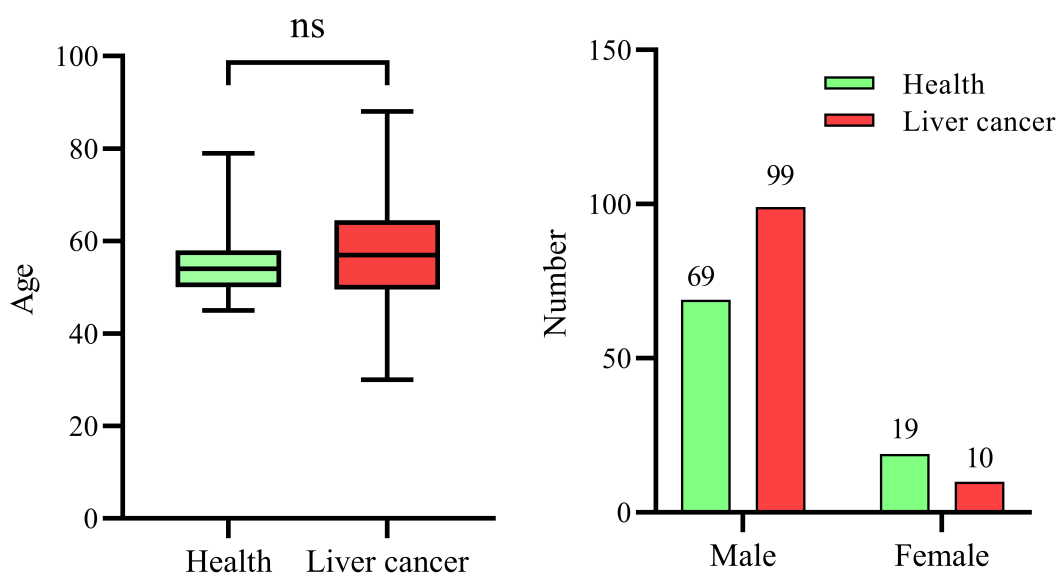

### S6 Analysis of concentration of serum samples in healthy group and liver cancer group

| Group        | Number | Average | SD    | Maximum | Minimum | Median | P value |
|--------------|--------|---------|-------|---------|---------|--------|---------|
| Health       | 88     | 2.596   | 0.774 | 6.666   | 1.563   | 2.368  | 0.59    |
| Liver cancer | 109    | 2.418   | 0.316 | 3.175   | 1.754   | 2.5    |         |

S7 Analysis of serum KIN17 protein concentration in healthy group and liver cancer group

| <b>Group</b>        | <b>Number</b> | <b>AVG±SD of KIN17<br/>(ng/mL)</b> | <b>P value</b> | <b>Differences</b> |
|---------------------|---------------|------------------------------------|----------------|--------------------|
| <b>Health</b>       | 88            | 0.3897±0.755                       | 0.0129         | Yes (*)            |
| <b>Liver cancer</b> | 109           | 1.730±5.647                        |                |                    |
